# Supplementary material for: Global spatiotemporal trends and determinants of COVID-19 vaccine acceptance on Twitter: a multilingual deep learning study in 135 countries and territories
Source: bioRxiv or medRxiv preprint supplement (doi:10.1101/2022.11.14.22282300), 2022-11-17

## Supplementary results for the manuscript

“Global spatiotemporal trends and determinants of COVID-19 vaccine acceptance on Twitter: a multilingual deep learning study in 135 countries and territories.”

### Supplementary material I section II: Supplementary Results

#### Table of contents:

|                                                                                                                                                                                                                                     |    |
|-------------------------------------------------------------------------------------------------------------------------------------------------------------------------------------------------------------------------------------|----|
| Table S5. Twitter users count, sorted by the number of tweets.....                                                                                                                                                                  | 2  |
| Figure S2. Spatiotemporal trends of tweet count.....                                                                                                                                                                                | 3  |
| Figure S3. Regional variations in COVID-19 vaccine acceptance, vaccine confidence, information environment, and prevalence of vaccine access-related discourse among Twitter users, November 13, 2020 – March 5, 2022.....          | 4  |
| Figure S4. Multilevel regression coefficients between COVID-19 vaccine acceptance on Twitter and COVID-19 vaccine uptake in each month.....                                                                                         | 5  |
| Table S6. Association between Twitter users’ acceptance and coverage of COVID-19 vaccination (n=131 countries or territories).....                                                                                                  | 6  |
| Figure S5. Regional weekly-level trends of COVID-19 vaccine acceptance, vaccine confidence, information environment, and prevalence of vaccine access-related discourse among Twitter users, November 13, 2020 – March 5, 2022..... | 7  |
| Figure S6. Weekly-level trends of weighted COVID-19 vaccine acceptance among Twitter users in 26 countries, November 13, 2020 – March 5, 2022.....                                                                                  | 8  |
| Figure S7. Global trends on vaccine adverse event, January 2004 - February 2022.....                                                                                                                                                | 9  |
| Figure S8. Weekly trends of 12 AEFI-related Google Trends topics in 26 countries or territories, November 2020 – February 2022.....                                                                                                 | 10 |

## Section II: Supplementary Results

**Table S5.** Twitter users count, sorted by the number of tweets.

| <i>number of tweets</i> | <i>number of users</i> | <i>percentage</i> |
|-------------------------|------------------------|-------------------|
| 1                       | 2320786                | 69.40%            |
| 2                       | 486,166                | 14.54%            |
| 3                       | 192,091                | 5.74%             |
| 4                       | 100,228                | 3.00%             |
| 5                       | 59,471                 | 1.78%             |
| 6                       | 39,208                 | 1.17%             |
| 7                       | 27,188                 | 0.81%             |
| 8                       | 20,478                 | 0.61%             |
| 9                       | 15,341                 | 0.46%             |
| 10                      | 11,710                 | 0.35%             |
| 11-20                   | 47,437                 | 1.42%             |
| 21-30                   | 12,368                 | 0.37%             |
| 31-40                   | 4,908                  | 0.15%             |
| 41-50                   | 2,460                  | 0.07%             |
| 51-100                  | 3,450                  | 0.10%             |
| $\geq 101$              | 854                    | 0.03%             |
| <i>sum</i>              | 3,344,144              | 100.00%           |

The table above illustrates how many human-generated tweets were sent by each user. Overall, 7,047,223 tweets analysed in this study were sent by a total of 3,344,144 users. The majority of the users (69.40%,  $N_{\text{user}} = 2,320,786$ ) only sent one tweet and most users (97.86%,  $N_{\text{user}} = 3,272,66$ ) sent less than 10 tweets. However, there are still 854 users who sent over 100 tweets.

**Figure S2.** Spatiotemporal trends of tweet count.

**Figure S2a.** Daily number of human-generated tweet.

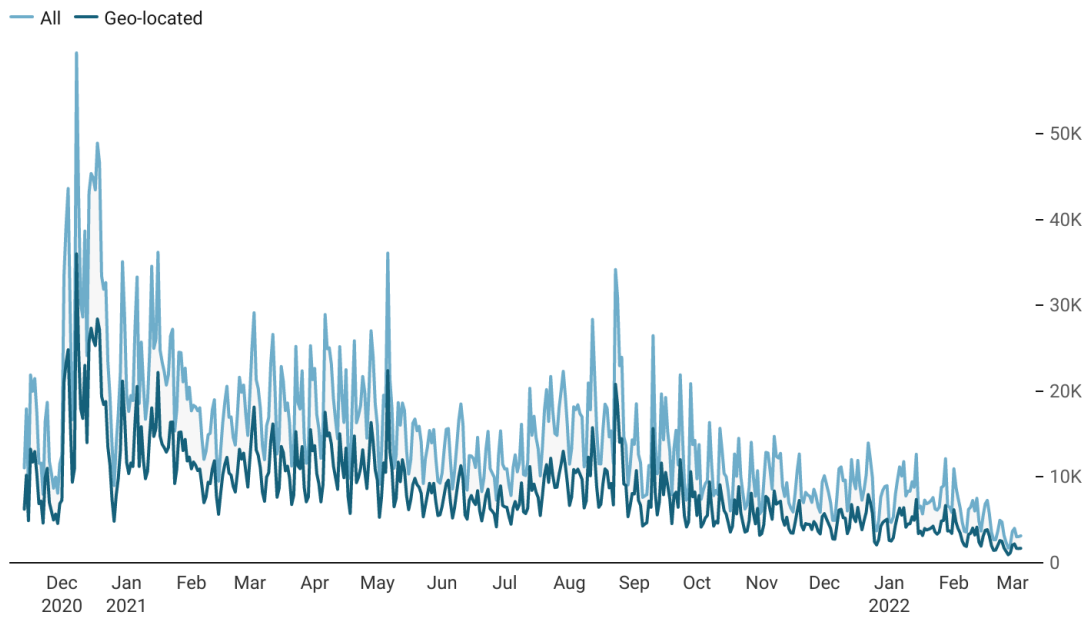

**Figure S2b.** Weekly proportion of tweet count at the country-level.

- Each point in the figure is calculated using the following formula.

$$Proportion = \frac{\text{The number of tweets sent by human in a specific week (in the country/territory)}}{\text{The number of tweets sent by human from November 13,2020 - March 5,2022 (in the country/territory)}}$$

- A point with a deeper colour suggests a higher percentage of tweets are sent during the period.

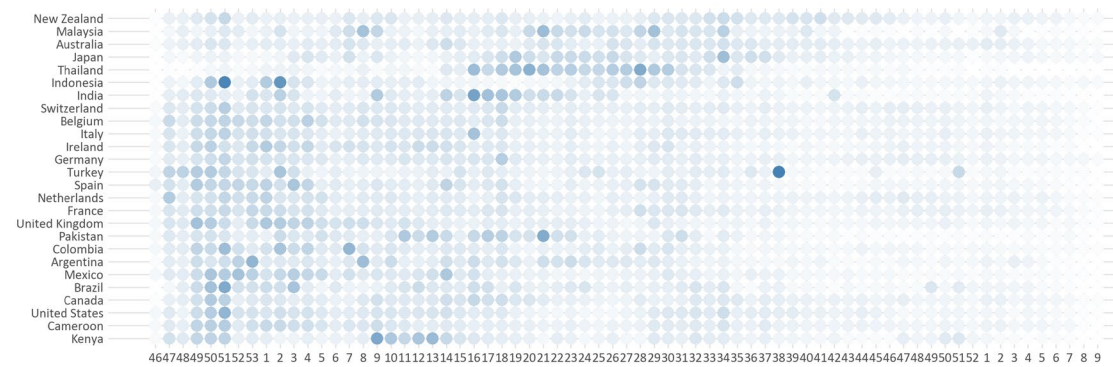

**Figure S3.** Regional variations in COVID-19 vaccine acceptance, vaccine confidence, information environment, and prevalence of vaccine access-related discourse among Twitter users, November 13, 2020 – March 5, 2022.

- Each point in the plot represents a country or territory.

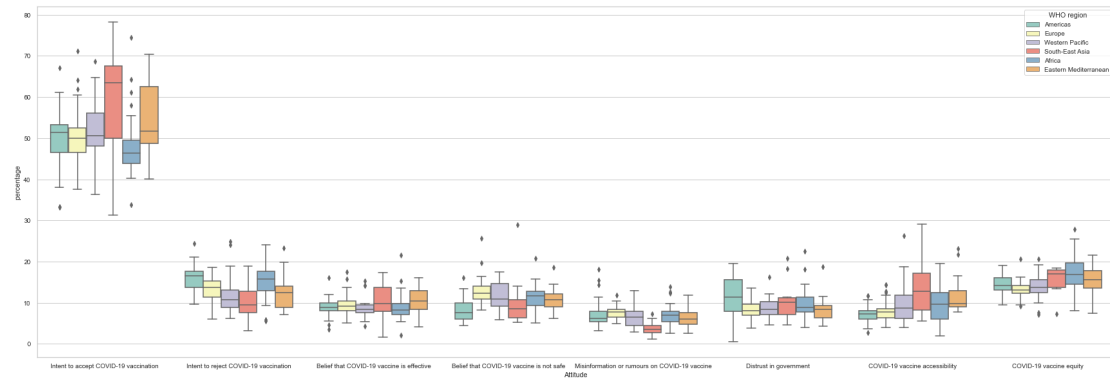

**Figure S4.** Multilevel regression coefficients between COVID-19 vaccine acceptance on Twitter and COVID-19 vaccine coverage in each month.

- Countries and territories are grouped according to WHO regions.

**Figure S4a.** COVID-19 vaccine acceptance v.s. monthly coverage

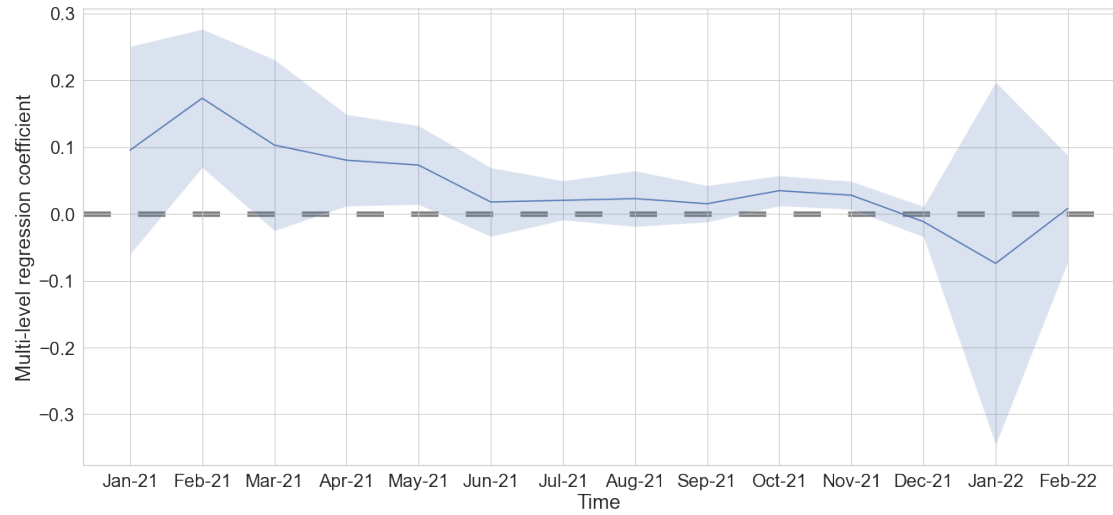

**Figure S4b.** COVID-19 vaccine rejection v.s. monthly coverage

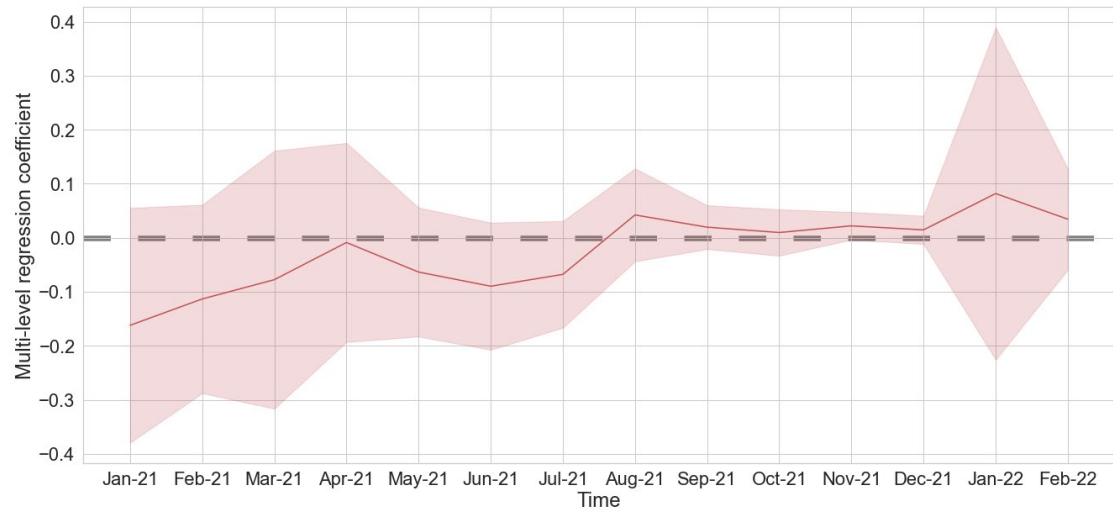

**Table S6.** Association between Twitter users' acceptance and coverage of COVID-19 vaccination across 131 countries and territories

**Table S6a.** Results from univariant linear regressions.

| Variables                             | COVID-19 vaccine coverage |                     |         |                |
|---------------------------------------|---------------------------|---------------------|---------|----------------|
|                                       | Coefficient               | 95% CI <sup>a</sup> | p-value | R <sup>2</sup> |
| Intent to accept COVID-19 vaccination | 1.007                     | [0.389,1.625]       | 0.002   | 7.5%           |
| Intent to reject COVID-19 vaccination | -1.983                    | [-3.166,-0.800]     | 0.001   | 7.9%           |

<sup>a</sup> Confidence Interval.

**Table S6b.** Results from multi-level regression analyses.

| Variables                                                                     | COVID-19 vaccine coverage |           |         |          |
|-------------------------------------------------------------------------------|---------------------------|-----------|---------|----------|
|                                                                               | Coefficient               | Std.Error | z value | Pr(> z ) |
| <b>Multi-level regression, grouped by WHO regions</b>                         |                           |           |         |          |
| Intent to accept COVID-19 vaccination                                         | 0.782                     | 0.242     | 3.226   | 0.001    |
| Intent to reject COVID-19 vaccination                                         | -1.223                    | 0.475     | -2.576  | 0.010    |
| <b>Multi-level regression, grouped by World Bank's national income levels</b> |                           |           |         |          |
| Intent to accept COVID-19 vaccination                                         | 0.929                     | 0.208     | 4.466   | 0.000    |
| Intent to reject COVID-19 vaccination                                         | -1.111                    | 0.430     | -2.582  | 0.010    |

**Figure S5.** Regional weekly-level trends of COVID-19 vaccine acceptance, vaccine confidence, information environment, and prevalence of vaccine access-related discourse among Twitter users, November 13, 2020 – March 5, 2022

- Each point in the figure represents the weekly-level prevalence of a specific category among all Twitter users in a given region.
- A point with a deeper colour suggests that a higher proportion of Twitter users expressed the specific opinion.

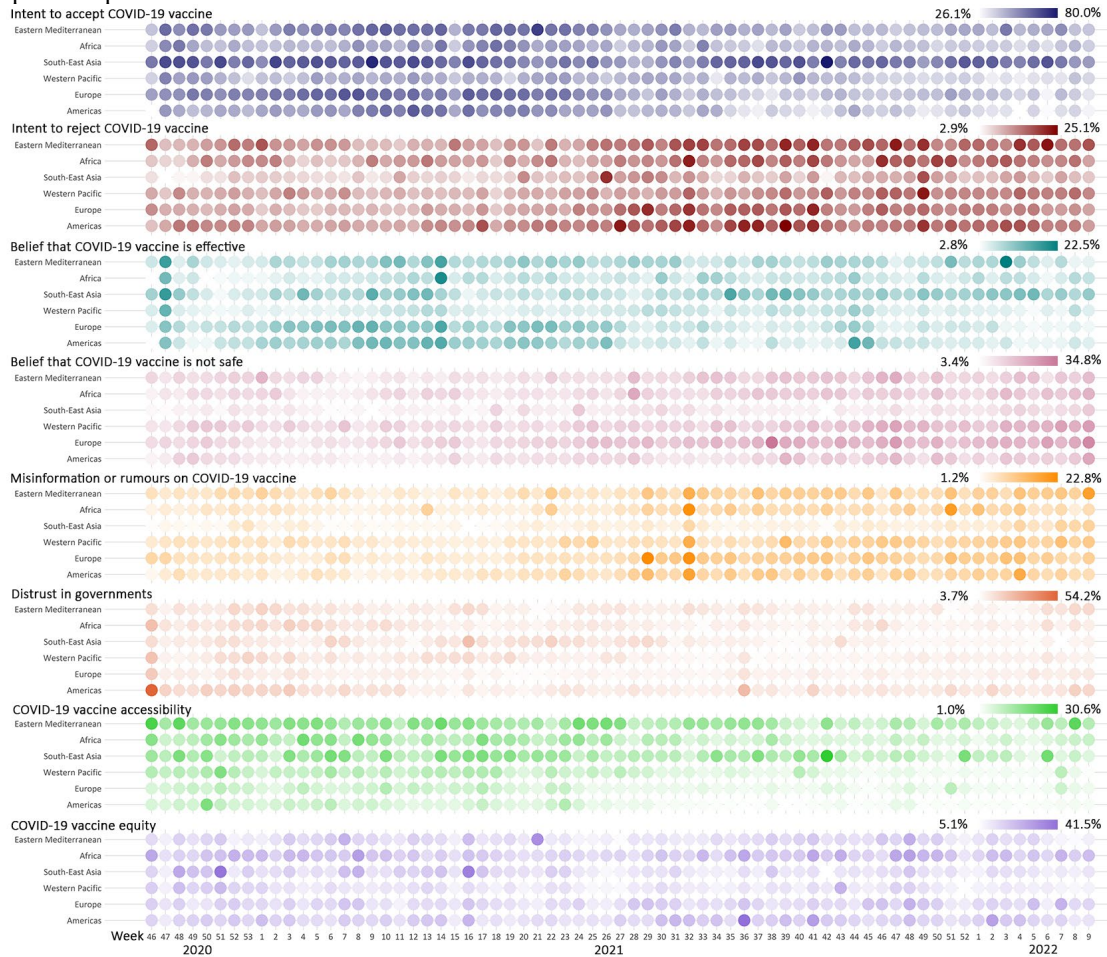

**Figure S6.** Weekly-level trends of weighted COVID-19 vaccine acceptance among Twitter users in 26 countries, November 13, 2020 – March 5, 2022

- Only the 26 countries or territories with sufficient Twitter data (total number of Twitter users mentioning COVID-19 vaccination >5000; weekly number >28) were shown.

**Figure S6a.** Weekly-level trends of weighted COVID-19 vaccine acceptance.

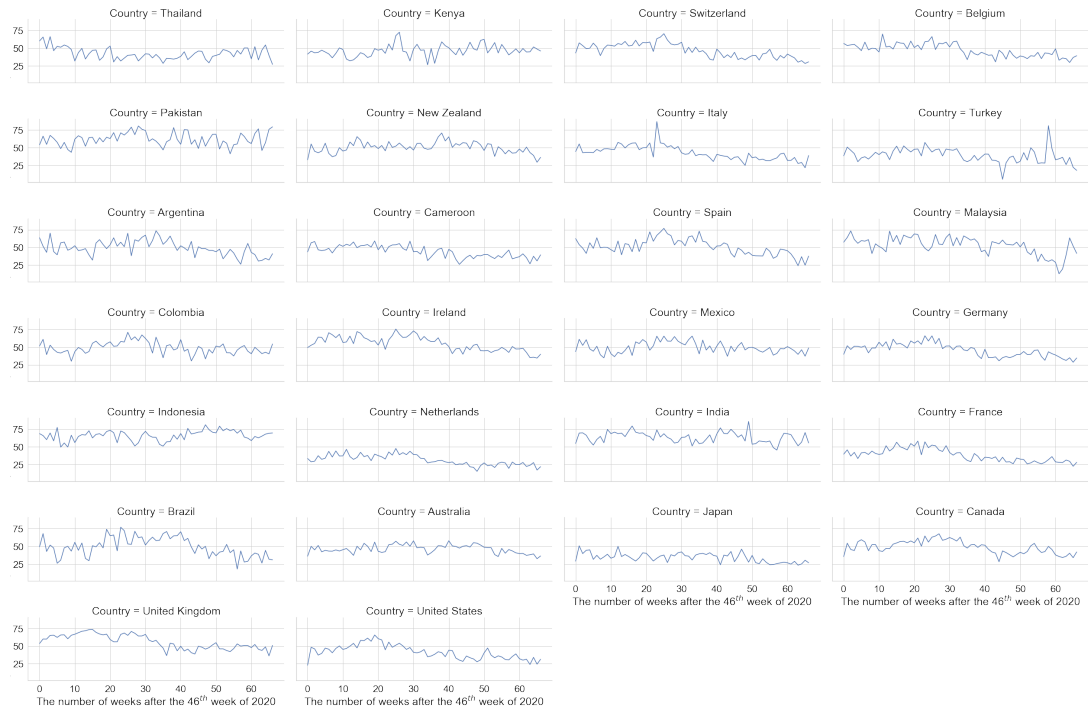

**Figure S6b.** Weekly-level trends of weighted COVID-19 vaccine refusal.

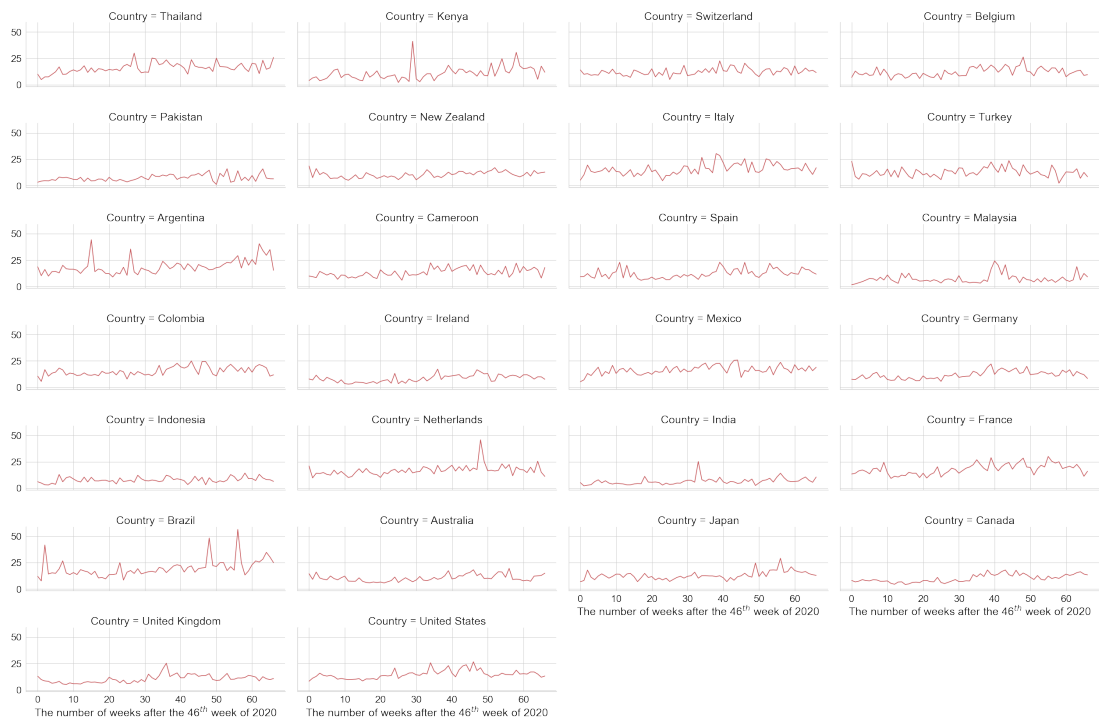



**Figure S7.** Global trends on vaccine adverse event, January 2004 - February 2022

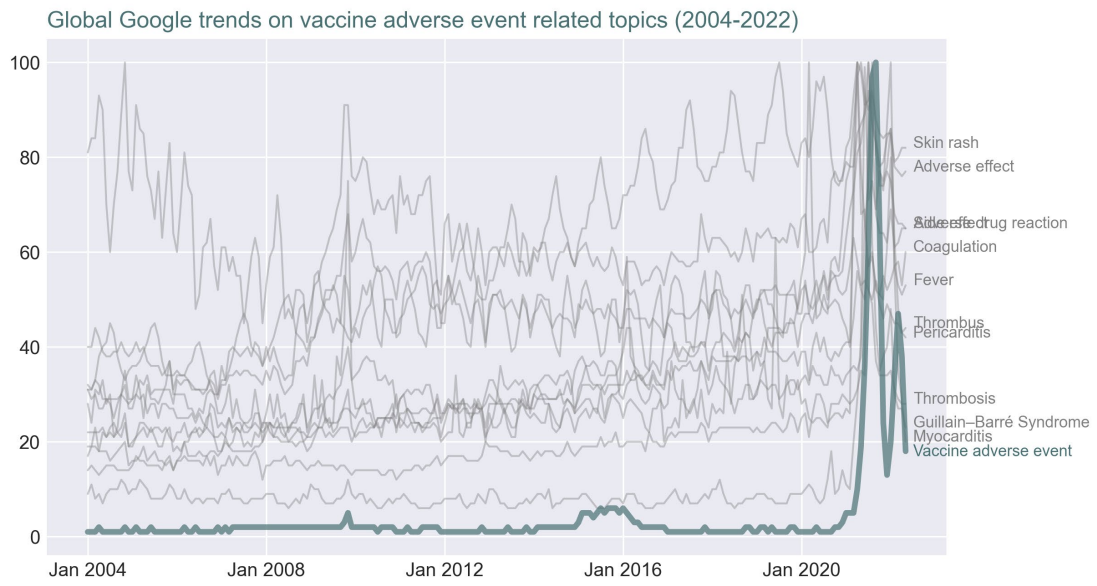

**Figure S8.** Weekly trends of 12 AEFI-related Google Trends topics in 26 countries or territories, November 2020 – February 2022

**Adverse drug reaction**

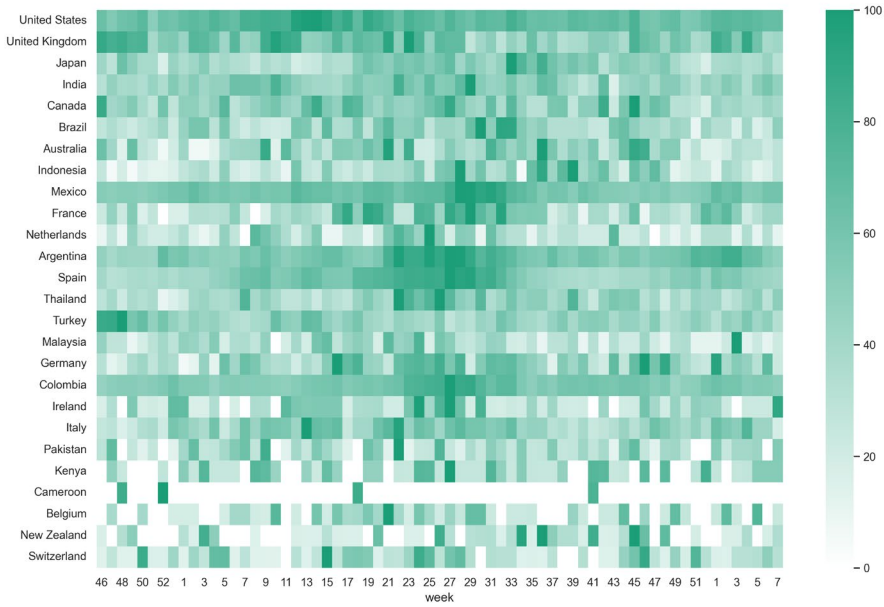

**Adverse effect**

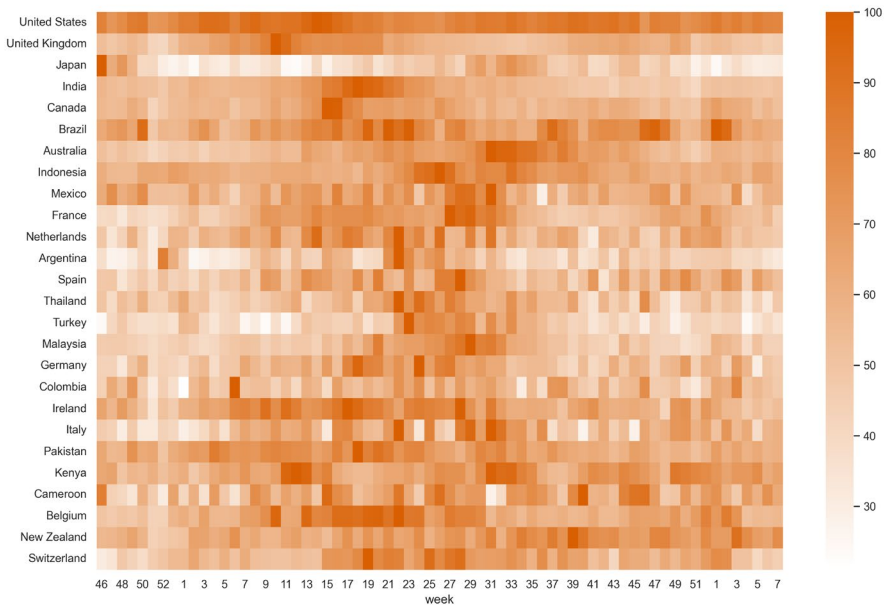

## Coagulation

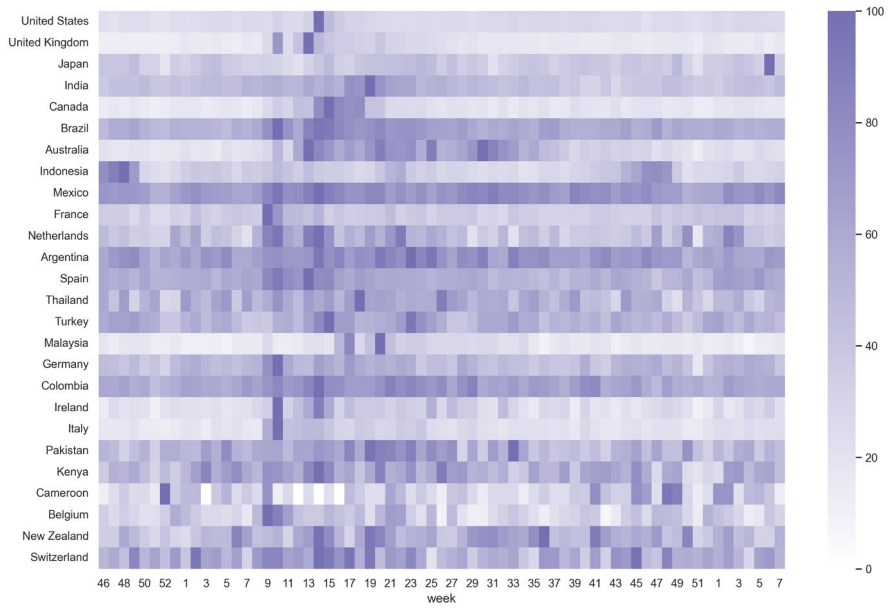

## Fever

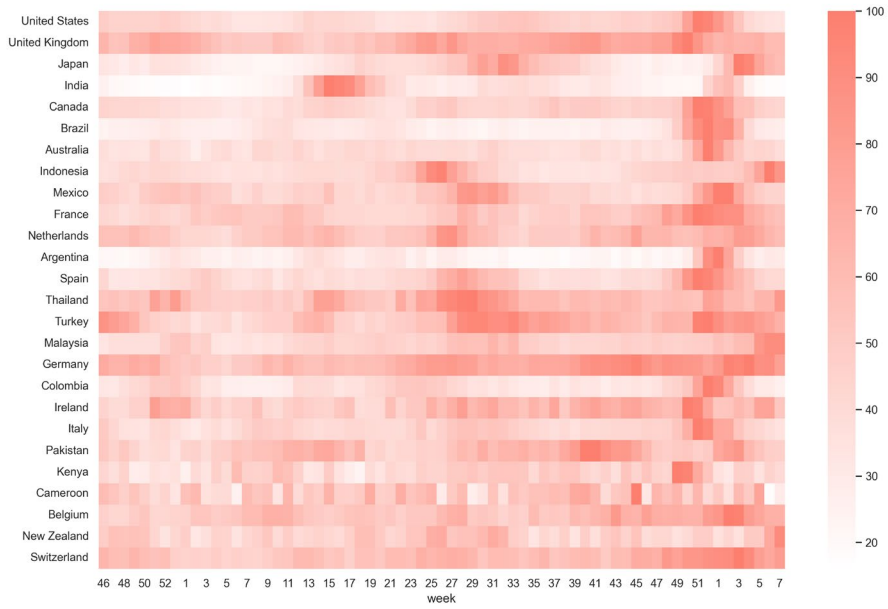

## Guillain–Barré Syndrome

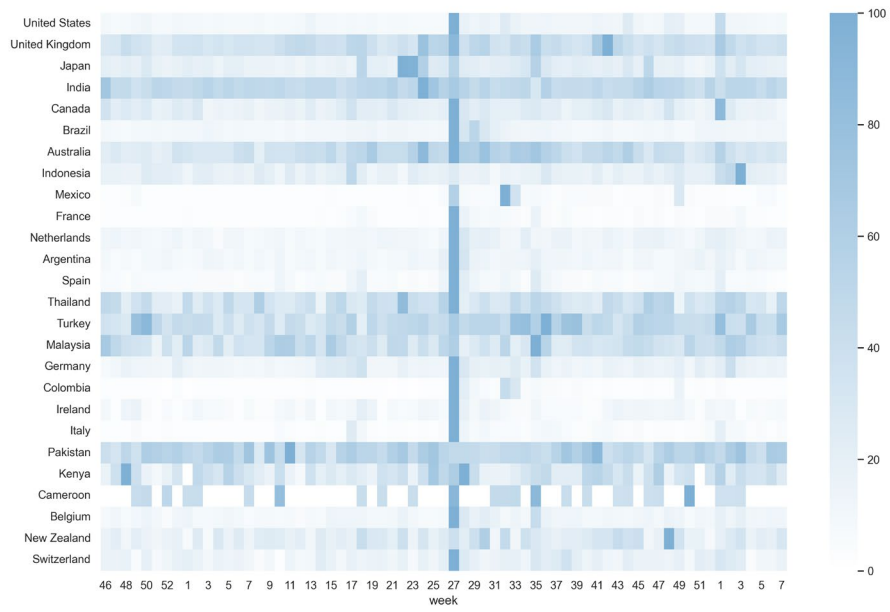

## Myocarditis

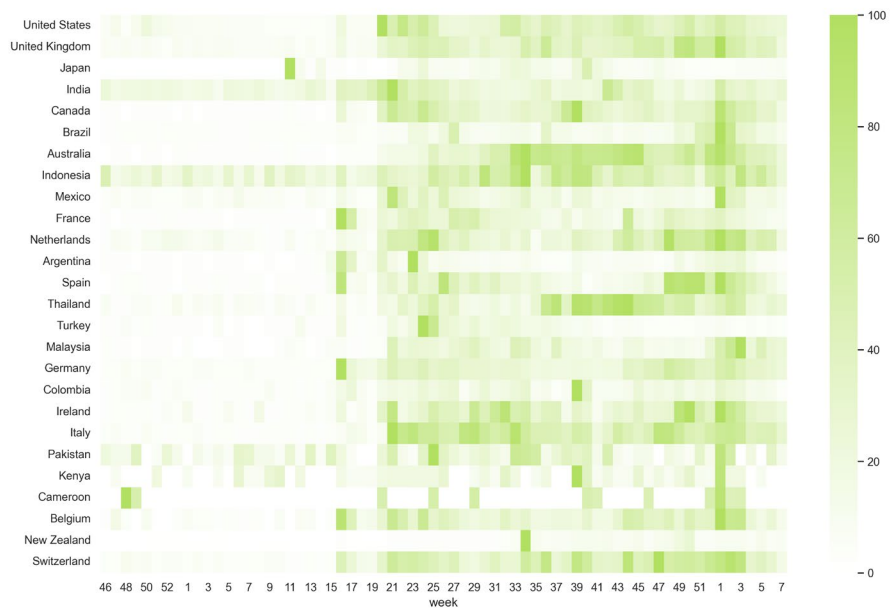

## Pericarditis

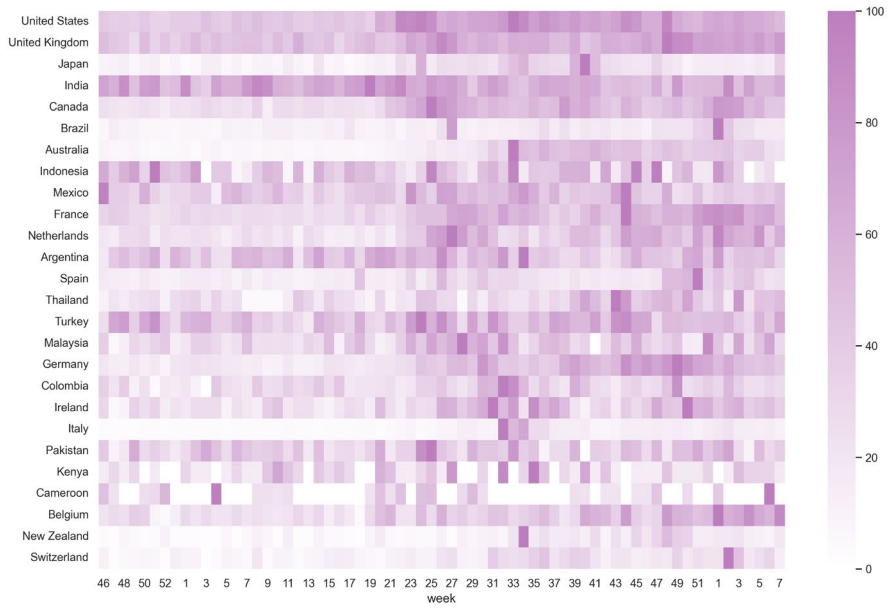

## Side effect

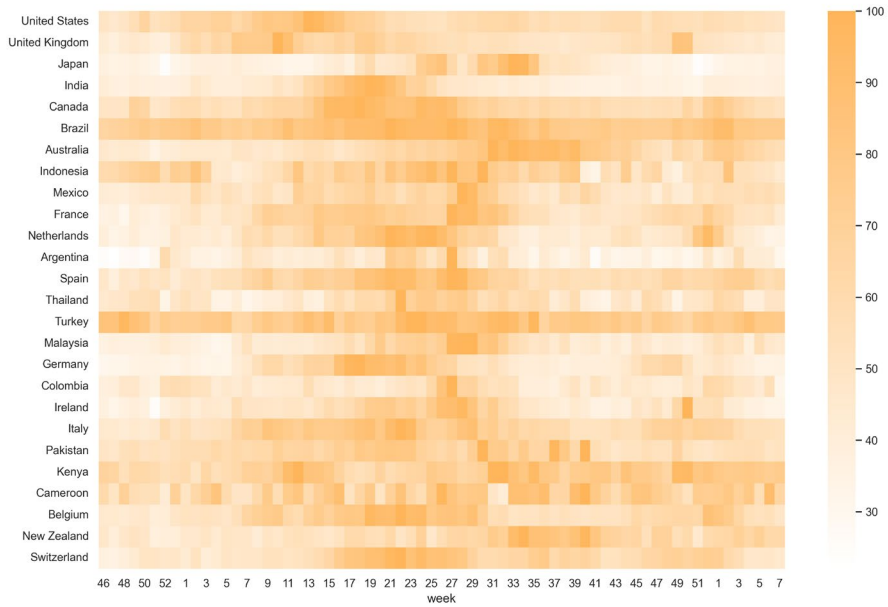

## Skin rash

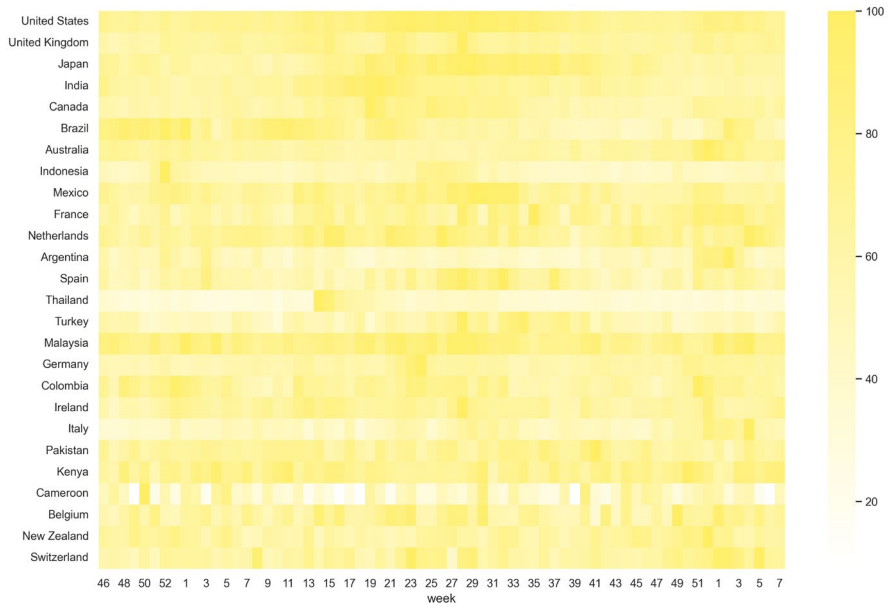

## Thrombosis

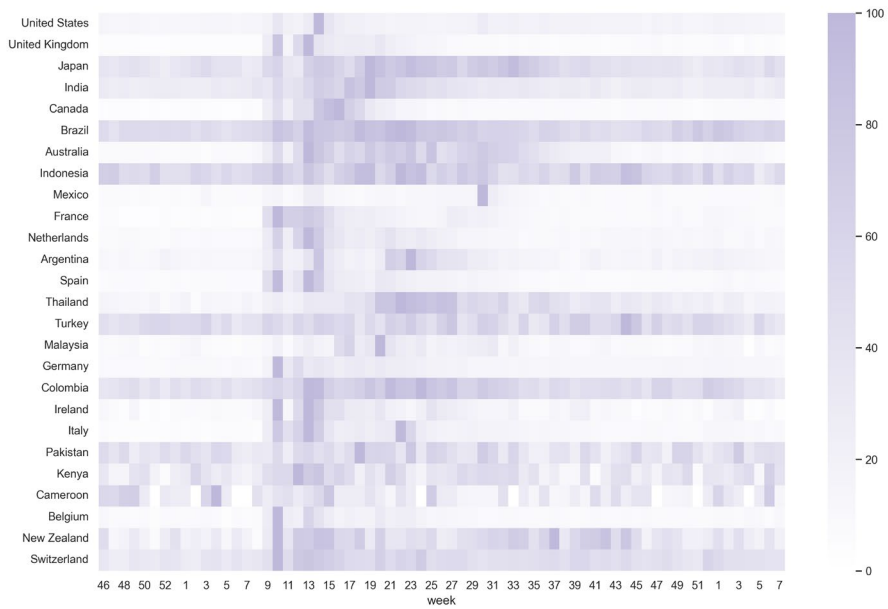

## Thrombus

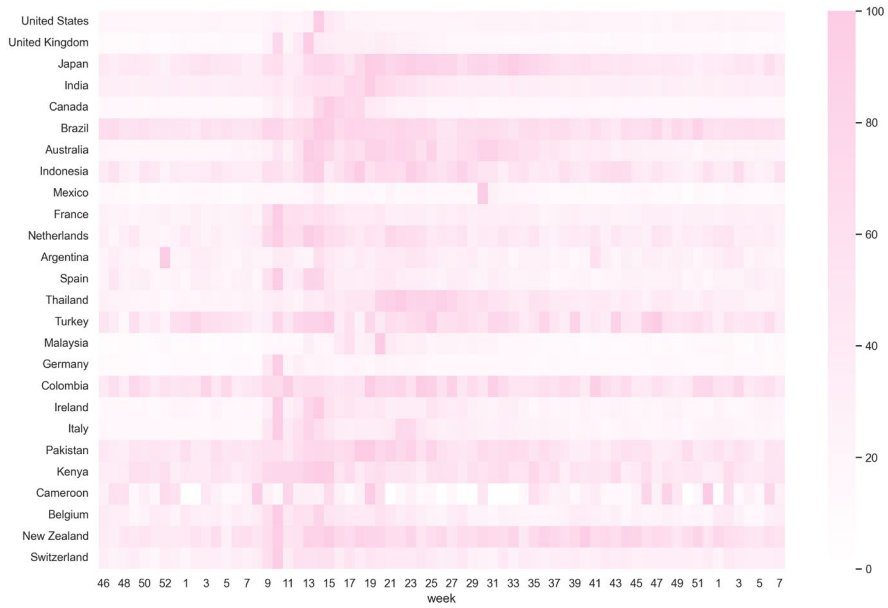

## Vaccine adverse event

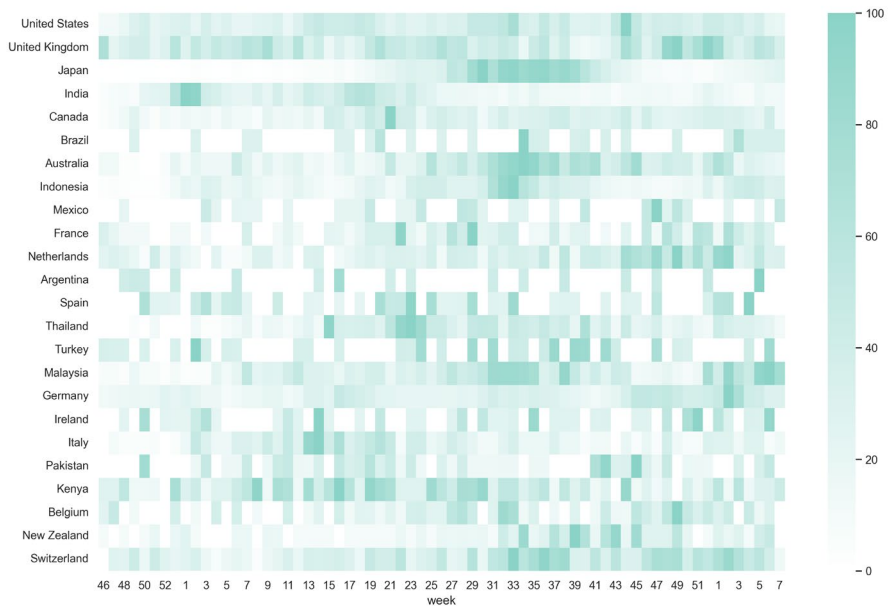

Supplement: Supplementary file [file media-2.pdf]
